# Supplementary material
Source: Research Square preprint supplement (doi:10.21203/rs.3.rs-9022011/v1)
Supplement: Supplementary file 1 [file 7fde47edff7d9ea07a0be26e.doc]

**Supplementary material**

Table S1. STROBE Statement—checklist of items that should be included in reports of observational studies

|  | Item No | Recommendation | Page |
| --- | --- | --- | --- |
| **Title and abstract** | 1 | (*a*) Indicate the study’s design with a commonly used term in the title or the abstract | 1 |
| (*b*) Provide in the abstract an informative and balanced summary of what was done and what was found | 2 |
| Introduction | | |  |
| Background/rationale | 2 | Explain the scientific background and rationale for the investigation being reported | 4 |
| Objectives | 3 | State specific objectives, including any prespecified hypotheses | 4 |
| Methods | | |  |
| Study design | 4 | Present key elements of study design early in the paper | 5 |
| Setting | 5 | Describe the setting, locations, and relevant dates, including periods of recruitment, exposure, follow-up, and data collection | 5 |
| Participants | 6 | (*a*) *Cohort study*—Give the eligibility criteria, and the sources and methods of selection of participants. Describe methods of follow-up | 5 |
| (*b*)*Cohort study*—For matched studies, give matching criteria and number of exposed and unexposed |  |
| Variables | 7 | Clearly define all outcomes, exposures, predictors, potential confounders, and effect modifiers. Give diagnostic criteria, if applicable | 5-6 |
| Data sources/ measurement | 8* | For each variable of interest, give sources of data and details of methods of assessment (measurement). Describe comparability of assessment methods if there is more than one group | *5-6* |
| Bias | 9 | Describe any efforts to address potential sources of bias | 7 |
| Study size | 10 | Explain how the study size was arrived at | S1 |
| Quantitative variables | 11 | Explain how quantitative variables were handled in the analyses. If applicable, describe which groupings were chosen and why | 6 |
| Statistical methods | 12 | (*a*) Describe all statistical methods, including those used to control for confounding | 6 |
| (*b*) Describe any methods used to examine subgroups and interactions | 6 |
| (*c*) Explain how missing data were addressed | 6 |
| (*d*) *Cohort study*—If applicable, explain how loss to follow-up was addressed | NA |
| (*e*) Describe any sensitivity analyses | 6 |

Continued on next page

| Results | | |  |  |
| --- | --- | --- | --- | --- |
| Participants | 13* | (a) Report numbers of individuals at each stage of study—eg numbers potentially eligible, examined for eligibility, confirmed eligible, included in the study, completing follow-up, and analysed |  | 8 |
| (b) Give reasons for non-participation at each stage |  | S1 |
| (c) Consider use of a flow diagram |  | S1 |
| Descriptive data | 14* | (a) Give characteristics of study participants (eg demographic, clinical, social) and information on exposures and potential confounders |  | 8 |
| (b) Indicate number of participants with missing data for each variable of interest |  | 8 |
| (c) *Cohort study*—Summarise follow-up time (eg, average and total amount) |  | 8 |
| Outcome data | 15* | *Cohort study*—Report numbers of outcome events or summary measures over time |  | *9* |
|  | | |
|  | | |
| Main results | 16 | (*a*) Give unadjusted estimates and, if applicable, confounder-adjusted estimates and their precision (eg, 95% confidence interval). Make clear which confounders were adjusted for and why they were included |  | 9-10 |
| (*b*) Report category boundaries when continuous variables were categorized |  | 9 |
|  |  |  |
| Other analyses | 17 | Report other analyses done—eg analyses of subgroups and interactions, and sensitivity analyses |  | 9-10 |
| Discussion | | |  |  |
| Key results | 18 | Summarise key results with reference to study objectives |  | 11 |
| Limitations | 19 | Discuss limitations of the study, taking into account sources of potential bias or imprecision. Discuss both direction and magnitude of any potential bias |  | 13 |
| Interpretation | 20 | Give a cautious overall interpretation of results considering objectives, limitations, multiplicity of analyses, results from similar studies, and other relevant evidence |  | 13 |
| Generalisability | 21 | Discuss the generalisability (external validity) of the study results |  | 13 |
| Other information | | |  |  |
| Funding | 22 | Give the source of funding and the role of the funders for the present study and, if applicable, for the original study on which the present article is based |  | 14 |

Figure S1. Consort flowchart of patient selection

Assessed for eligibility

(n = 8348)

**Enrollment**

Excluded (n = 7807)

Sepsis without shock

(n = 2498)

Shock of other origin

(n = 687)

Neither sepsis nor shock

(n = 4622)

Incomplete records

(n = 34)

Selected (n = 541)

#

**Analysis**

Analyzed (n = 506)

**Results of adjusted optimal binning procedure**

Optimal binning was employed to identify NE levels based on significant changes in ICU mortality percentages. It allowed identification of four patient groups with statistically significant difference in risk of death according to NE dose: between 0.05 and 0.6 µg/kg*min, between 0.61 and 1.2 µg/kg*min, between 1.2 and 3 µg/kg*min, and more than 3.0 µg/kg*min respectively. ICU and in-hospital mortality were 20.7 % (57/275) and 32.4% (89/275) between 0.05 and 0.6 µg/kg*min; 39.1 % (43/110) and 45.5% (50/110) between 0.61 and 1.2 µg/kg*min; 59.0% (52/89) and 64.0% (56/88) between 1.2 and 3.0 µg/kg*min; over 3 µg/kg*min, mortality was 100% (32/32 - Figure 1 and 2). After excluding patients for whom a decision had been made to withdraw life-sustaining therapies, both ICU and in-hospital mortality increased across the NE peak-dose groups: 13.4% and 24.4% between 0.05 and 0.6 µg/kg*min, 22.4% and 29.4% between 0.61 and 1.2 µg/kg*min, 50.7% and 56.8% between 1.2 and 3.0 µg/kg*min, and 100% over 3.0 µg/kg/min (p < 0.001).
